# Supplementary material
Source: HighWire-hosted journal article supplement (http://dmd.aspetjournals.org/highwire/filestream/79758/field_highwire_adjunct_files/2/1087_supp_fig3.pdf)
Supplement: 1087_supp_fig3.pdf [file 1087_supp_fig3.pdf]

## Metabolic disposition of triazolam and clobazam in humanized CYP3A mice with a double knockout background of mouse *Cyp2c* and *Cyp3a* genes

Kaoru Kobayashi, Genki Minegishi, Nina Kuriyama, Atsushi Miyajima, Satoshi Abe, Kanako Kazuki, Yasuhiro Kazuki

Drug Metabolism and Disposition

Manuscript Number: DMD-AR-2022-001087

### A. Liver

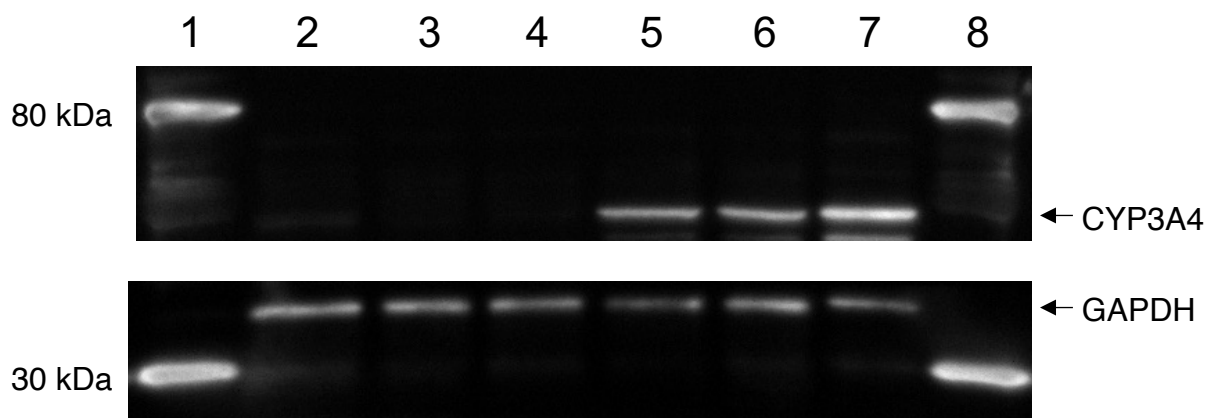

### B. Intestine

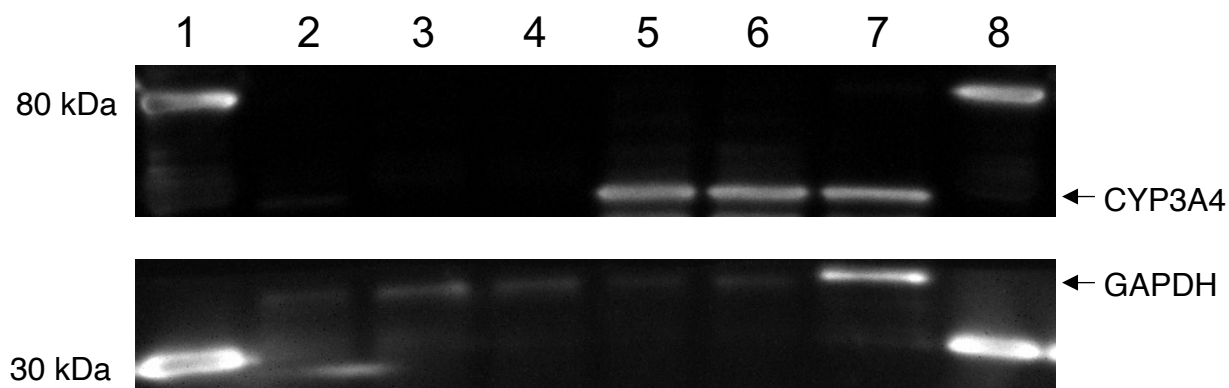

### Supplemental Fig. 3 Expression CYP3A protein in the liver and intestine of hCYP3A/3aKO and hCYP3A/2c3aKO mice.

Microsomal proteins (4  $\mu$ g/lane) of livers and small intestines were applied to gels. Lane 1: ladder, lane 2: WT, lane 3: 3aKO, lane 4: 2c3aKO, lane 5: hCYP3A/3aKO, lane 6: hCYP3A/2c3aKO, lane 7: human, lane 8: ladder. A mouse monoclonal anti-CYP3A4 antibody (1:2000, sc-53850) and a rabbit monoclonal anti-GAPDH antibody (1:10000, ab181602) were used as Primary antibodies.
